# Supplementary material for: A novel stress response mechanism, triggered by indole, involved in quorum quenching enzyme MomL and iron-sulfur cluster in Muricauda olearia Th120
Source: PubMed Central journal article supplement (PMC5484670; doi:10.1038/s41598-017-04606-8), 2017-06-26
Supplement: 41598_2017_4606_MOESM1_ESM.pdf [file 41598_2017_4606_MOESM1_ESM.pdf]

**A novel stress response mechanism, triggered by indole, involved in  
quorum quenching enzyme MomL and iron-sulfur cluster in  
*Muricauda olearia* Th120**

**Yan Wang<sup>1</sup>, Hui Li<sup>1</sup>, Xinxin Cui<sup>1</sup>, Xiao-Hua Zhang<sup>1,2\*</sup>**

*1. College of Marine Life Sciences, Ocean University of China, Qingdao, 266003, China*

*2. Laboratory for Marine Ecology and Environmental Science, Qingdao National Laboratory for Marine Science  
and Technology, Qingdao 266071, China*

*\* Author to whom correspondence should be addressed; E-Mail: xhzhang@ouc.edu.cn (X.-H.Z.); Tel/Fax:  
+86-532-82032767.*

**Running title: Study of a novel stress response mechanism**

Figure S1. The OD<sub>600</sub> value comparison between with (black) or without indole (transparent) conditions. Error bars represent the standard deviations of three replicates. For statistical analysis, \*\*\*/ \*\* /\* means P<0.001, P<0.01, and P<0.05, respectively.

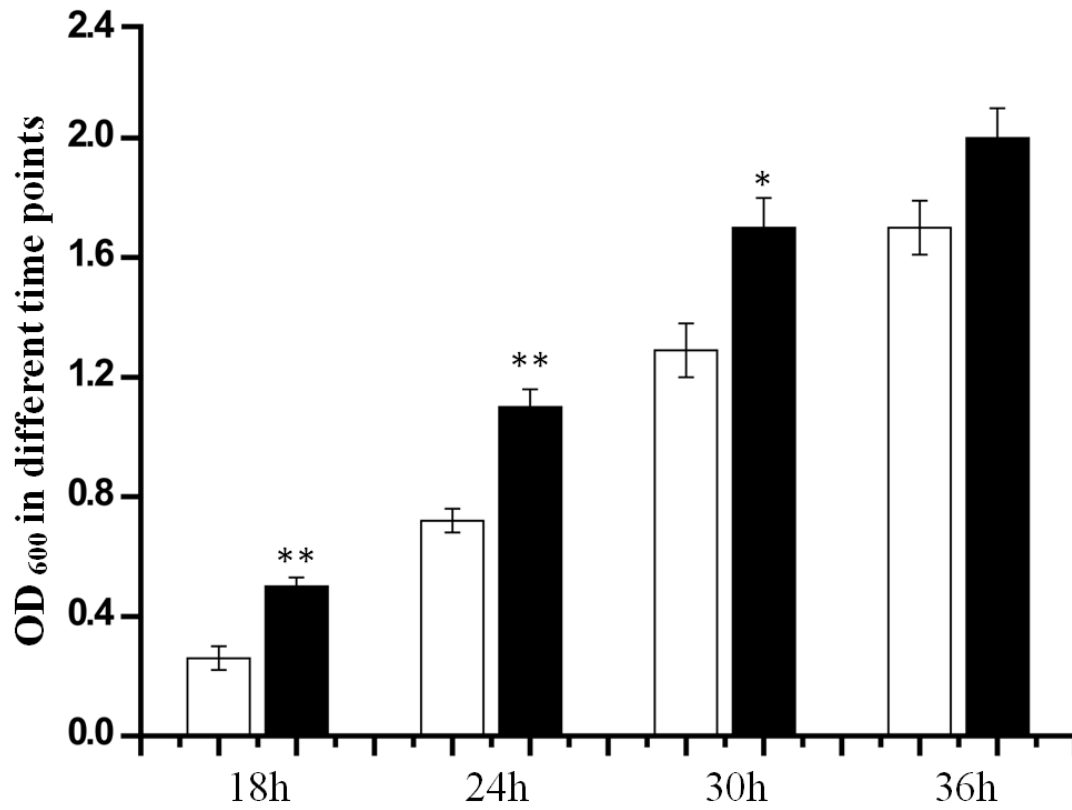

Figure S2. The gene cluster of *suf-momL* of *Muricauda olearia* Th120.

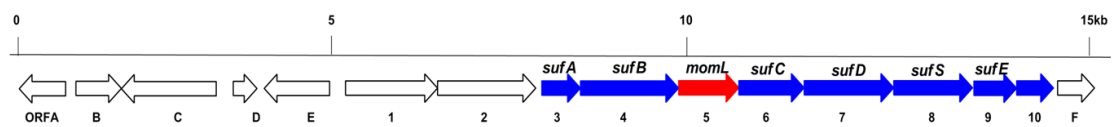

| ORF   | Blast homolog                                              | #aa |
|-------|------------------------------------------------------------|-----|
| ORFA  | member protein                                             | 229 |
| ORFB  | membrane-associated phospholipid phosphatase               | 230 |
| ORFC  | branched-chain amino acid transport system carrier protein | 429 |
| ORFD  | hypothetical protein                                       | 84  |
| ORFE  | thiamine-monophosphate kinase                              | 347 |
| ORF1  | regulator/secreted protein                                 | 414 |
| ORF2  | hypothetical protein                                       | 445 |
| ORF3  | Fe-S binding protein SufA                                  | 109 |
| ORF4  | Fe-S metabolism associated SufB                            | 481 |
| ORF5  | AHL-lactonase MomL                                         | 294 |
| ORF6  | ABC transporter ATP-binding protein SufC                   | 249 |
| ORF7  | FeS assembly protein SufD                                  | 439 |
| ORF8  | cysteine desulfurase SufS                                  | 408 |
| ORF9  | Fe-S metabolism associated SufE                            | 140 |
| ORF10 | Fe-S assembly suf system protein                           | 106 |
| ORFF  | hypothetical protein                                       | 108 |

Figure S3. Sequence alignment of *oxyR* genes.

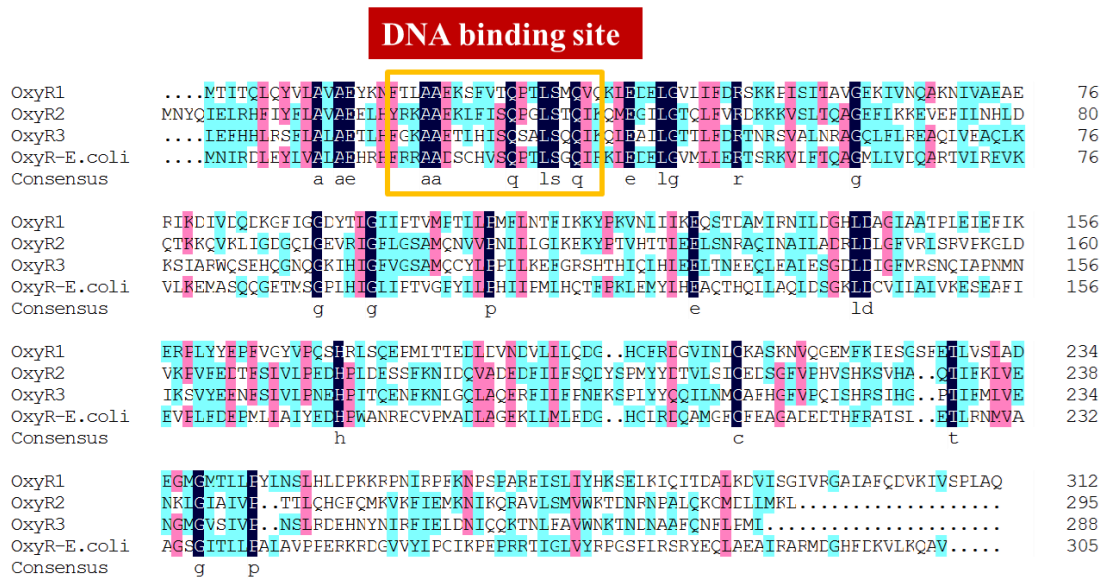

Figure S4. the  $R^2$  value (Pearson correlation coefficient) of the transcriptome assay and real-time PCR.

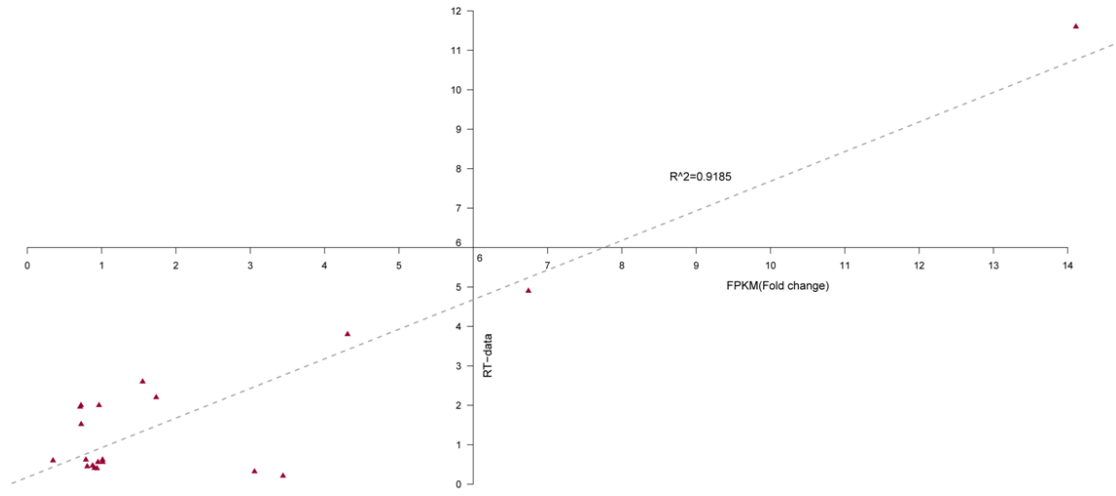

Table S1. Primer information for transcriptional analysis of target genes.

|                       |                        |
|-----------------------|------------------------|
| 16S-forward           | TACGGGAAGAAACCACC      |
| 16S-reverse           | GCCAGTATCAAAGGCAAT     |
| <i>orfE</i> -forward  | GCCTTGCTTCCCTTTC       |
| <i>orfE</i> -reverse  | CCACCCAAGTCACTGTTTC    |
| <i>orfI</i> -forward  | TGCCTTGGTGGGTCTG       |
| <i>orfI</i> -reverse  | TGCCGTGATTACTTGCTT     |
| <i>sufA</i> -forward  | TCGGAAACAGCCAAGC       |
| <i>sufA</i> -reverse  | CACGGCATTATCCTCAA      |
| <i>sufB</i> -forward  | TGCCGTGGATATTGTCA      |
| <i>sufB</i> -reverse  | CCCTTTCGGAATGTAGC      |
| <i>momL</i> -forward  | TCTTCCAGAGCCCTTAC      |
| <i>momL</i> -reverse  | GGTTGTCCTCGCTTGTC      |
| <i>sufC</i> -forward  | GTCCAGAAAGGCAAGGG      |
| <i>sufC</i> -reverse  | CAGAATCGGTCTCATCCA     |
| <i>sufE</i> -forward  | TGTCAGAGTAAGGTTTGGGTA  |
| <i>sufE</i> -reverse  | AGTTGCTTTACCATACTCACC  |
| <i>orf10</i> -forward | GAAGAAACCACCATAGATACAC |
| <i>orf10</i> -reverse | GGCAAACCTTCCGCTAC      |
| <i>orfF</i> -forward  | CTTGGAACCTGCGCTCTA     |
| <i>orfF</i> -reverse  | GATTGGCACCGAGGAA       |
| <i>oxyR1</i> -forward | TGCTACTACAGGACGGACAT   |
| <i>oxyR1</i> -reverse | TTGAGGGCATCGGTTAT      |
| <i>oxyR2</i> -forward | TATCCTACCGTGCATACC     |
| <i>oxyR2</i> -reverse | AAATCTTCATCGGCTACT     |
| <i>oxyR3</i> -forward | TTGGCAATCCGAACACC      |
| <i>oxyR3</i> -reverse | GGTTGGACCGCATAAAA      |
| <i>fur</i> -forward   | CGTGTTCACTGCCTTCC      |
| <i>fur</i> -reverse   | GCTTGCGTACCAGTTTG      |
| <i>himA</i> -forward  | ATCTTTCTTGGGAAATGTAG   |
| <i>himA</i> -reverse  | TCAATTCTGCTCCTGCT      |
| <i>himD</i> -forward  | CTTGGAGAATGGAGACA      |
| <i>himD</i> -reverse  | TTACGCCTTCTACAAA       |

Table S2. Survival rate of *Pcc* under Km condition.

| Condition      | Survival rate of <i>Pcc</i> |
|----------------|-----------------------------|
| LB+20 µg/mL Km | 0                           |
| LB+25 µg/mL Km | 0                           |
| LB+50 µg/mL Km | 0                           |

Table S3. The affect of boiled inactivated MomL towards survival rate of *M. olearia* Th120 and *Pcc*.

| Condition                                        | Survival rate of <i>M. olearia</i> Th120 | Survival rate of <i>Pcc</i> |
|--------------------------------------------------|------------------------------------------|-----------------------------|
| Strains Co-culture                               | 41%                                      | 39%                         |
| Strains Co-culture with 0.1U/ml inactivated MomL | 40%                                      | 40%                         |
| Strains Co-culture with 1U/ml inactivated MomL   | 43%                                      | 42%                         |

Table S4. List of *suf* related genes regulated by indole in the transcriptome assay.

| Gene description | Fold change |
|------------------|-------------|
| <i>sufA-sufE</i> | 5.1-8.7     |
| <i>momL</i>      | 6.3         |
| <i>oxyR1</i>     | 4.1         |

Table S5. Significantly enriched pathways and mapped genes regulated by indole based on KEGG pathway analysis.

| gene categories                                        | p value | enrich DEGs     | NR function                                                                         | KEGG function                                                 | KEGG detailed function                                             |
|--------------------------------------------------------|---------|-----------------|-------------------------------------------------------------------------------------|---------------------------------------------------------------|--------------------------------------------------------------------|
| Lysine biosynthesis<br>(ko00300)                       | 0.0184  | <i>gene301</i>  | diaminopimelate epimerase                                                           | K01778  <i>dapF</i>                                           | K01778(diaminopimelate epimerase)                                  |
|                                                        |         | <i>gene1097</i> | UDP-N-acetylmuramoylalanyl-D-glutamyl-2,6-diaminopimelate--D-alanyl-D-alanyl ligase | K01929  <i>murF</i>                                           | K01929(UDP-N-acetylmuramoyl-tripeptide--D-alanyl-D-alanine ligase) |
|                                                        |         | <i>gene2657</i> | UDP-N-acetylmuramoyl-L-alanyl-D-glutamate-2, 6-diaminopimelate ligase               | K01928  <i>murE</i>                                           | K01928(UDP-N-acetylmuramoyl-tripeptide--D-alanyl-D-alanine ligase) |
|                                                        |         | <i>gene3005</i> | aspartate kinase                                                                    | K00928  <i>lysC</i>                                           | K00928(aspartate kinase)                                           |
| Vancomycin resistance<br>(ko01502)                     | 0.0247  | <i>gene882</i>  | D-alanyl-D-alanine dipeptidase                                                      | K08641  <i>vanX</i>                                           | K08641(D-alanyl-D-alanine dipeptidase)                             |
|                                                        |         | <i>gene1097</i> | UDP-N-acetylmuramoylalanyl-D-glutamyl-2,6-diaminopimelate-D-alanyl-D-alanyl ligase  | K01929  <i>murF</i>                                           | K01929(UDP-N-acetylmuramoyl-tripeptide--D-alanyl-D-alanine ligase) |
|                                                        |         | <i>gene2656</i> | phospho-N-acetylmuramoyl-pentapeptide-transferase                                   | K01000  <i>mraY</i>                                           | K01000(phospho-N-acetylmuramoyl-pentapeptide-transferase)          |
| C5-Branched<br>dibasic acid<br>metabolism<br>(ko00660) | 0.0323  | <i>gene160</i>  | 3-isopropylmalate dehydrogenase                                                     | K00052  <i>leuB</i>                                           | K00052(3-isopropylmalate dehydrogenase)                            |
|                                                        |         | <i>gene676</i>  | succinyl-CoA synthetase subunit beta                                                | K01903  <i>sucC</i>                                           | K01903(succinyl-CoA synthetase beta subunit)                       |
|                                                        |         | <i>gene170</i>  | acetolactate synthase large subunit                                                 | K01652 E2.2.1.6L<br>, <i>ilvB</i> , <i>ilvG</i> , <i>ilvI</i> | K01652(acetolactate synthase I/II/III large subunit)               |
| Two-component<br>system<br>(ko02020)                   | 0.0577  | <i>gene1134</i> | LuxR family transcriptional regulator                                               | K11618  <i>liaR</i>                                           | K11618(two-component system, NarL family, response regulator LiaR) |
|                                                        |         | <i>gene1255</i> | acriflavin resistance protein                                                       | K07787  <i>cusA</i> , <i>silA</i>                             | K07787(Cu(I)/Ag(I) efflux system membrane protein CusA/SilA)       |
|                                                        |         | <i>gene2036</i> | copper/silver resistance-related transport membrane protein                         | K07787  <i>cusA</i> , <i>silA</i>                             | K07787(Cu(I)/Ag(I) efflux system membrane protein CusA/SilA)       |
|                                                        |         | <i>gene882</i>  | D-alanyl-D-alanine dipeptidase                                                      | K08641  <i>vanX</i>                                           | K08641(D-alanyl-D-alanine dipeptidase)                             |



Table S6. List of TonB transfer system genes regulated by indole.

| Gene description          | Fold change |
|---------------------------|-------------|
| TonB-dependent receptor-1 | 2.3         |
| TonB-dependent receptor-2 | 3.4         |
| TonB-1                    | 6.5         |
| TonB-2                    | 7.8         |
| TonB-3                    | 7.2         |
